# Supplementary material for: Quantifying the biodiversity pressures of fruit and vegetable consumption in the United Kingdom, India, and South Africa
Source: Research Square preprint supplement (doi:10.21203/rs.3.rs-3954180/v1), 2024-04-19
Supplement: Supplementary file 3 [file 5d7871e0828c01605ee543de.xlsx]

## Sheet: 1.Total_Species_per_Country
ISO3_country	Country	SR_total
ATG	Antigua and Barbuda	176.945
DZA	Algeria	2.03696e+06
AZE	Azerbaijan	323469
ALB	Albania	90706.6
ARM	Armenia	102330
AGO	Angola	6259871
ASM	American Samoa	19.735
ARG	Argentina	8456031
AUS	Australia	26138252
BHR	Bahrain	200.101
BRB	Barbados	178.991
BMU	Bermuda	12.6282
BHS	Bahamas	9354.12
BGD	Bangladesh	506706
BLZ	Belize	120445
BIH	Bosnia and Herzegovina	174107
BOL	Bolivia	6.95865e+06
MMR	Burma	4145451
BEN	Benin	653738
SLB	Solomon Islands	24356.3
BRA	Brazil	69800520
BGR	Bulgaria	381043
BRN	Brunei Darussalam	31352.5
CAN	Canada	24390630
KHM	Cambodia	928311
LKA	Sri Lanka	235950
COG	Congo	2.1192e+06
COD	Democratic Republic of the Congo	13576312
BDI	Burundi	184158
CHN	China	25295472
AFG	Afghanistan	1.2892e+06
BTN	Bhutan	201576
CHL	Chile	1.0497e+06
CYM	Cayman Islands	114.371
CMR	Cameroon	3.0829e+06
TCD	Chad	2.66029e+06
COM	Comoros	924.123
COL	Colombia	8.10562e+06
CRI	Costa Rica	325716
CAF	Central African Republic	3.05694e+06
CUB	Cuba	210391
CPV	Cape Verde	794.629
COK	Cook Islands	46.2882
CYP	Cyprus	13334
DNK	Denmark	130689
DJI	Djibouti	49445.7
DMA	Dominica	444.925
DOM	Dominican Republic	83946.9
ECU	Ecuador	1.64204e+06
EGY	Egypt	754795
IRL	Ireland	131024
GNQ	Equatorial Guinea	179980
EST	Estonia	230435
ERI	Eritrea	348331
SLV	El Salvador	73790.2
ETH	Ethiopia	4.25094e+06
AUT	Austria	287789
CZE	Czech Republic	319482
GUF	French Guiana	795698
FIN	Finland	1.47904e+06
FJI	Fiji	14961.6
FLK	Falkland Islands (Malvinas)	11989.2
FSM	Micronesia, Federated States of	229.257
PYF	French Polynesia	589.786
FRA	France	1.81386e+06
GMB	Gambia	67576.3
GAB	Gabon	1.74282e+06
GEO	Georgia	277410
GHA	Ghana	1.42367e+06
GRD	Grenada	158.562
GRL	Greenland	817926
DEU	Germany	1.29812e+06
GUM	Guam	174.043
GRC	Greece	355948
GTM	Guatemala	511920
GIN	Guinea	1.28479e+06
GUY	Guyana	2.01563e+06
HTI	Haiti	49203.6
HND	Honduras	557400
HRV	Croatia	182244
HUN	Hungary	353036
ISL	Iceland	102928
IND	India	12502574
IRN	Iran (Islamic Republic of)	3.28201e+06
ISR	Israel	56797.8
ITA	Italy	829617
CIV	Cote d'Ivoire	2001524
IRQ	Iraq	505916
JPN	Japan	899124
JAM	Jamaica	15562.9
JOR	Jordan	122015
KEN	Kenya	2.98573e+06
KGZ	Kyrgyzstan	600813
PRK	Korea, Democratic People's Republic of	348737
KIR	Kiribati	169.504
KOR	Korea, Republic of	207631
KWT	Kuwait	21357.7
KAZ	Kazakhstan	8684418
LAO	Lao People's Democratic Republic	1.5496e+06
LBN	Lebanon	22912.7
LVA	Latvia	303763
BLR	Belarus	1.00741e+06
LTU	Lithuania	311833
LBR	Liberia	597801
SVK	Slovakia	184093
LIE	Liechtenstein	377.808
LBY	Libyan Arab Jamahiriya	904944
MDG	Madagascar	1.31608e+06
MTQ	Martinique	450.668
MNG	Mongolia	4.40615e+06
MSR	Montserrat	33.2909
MKD	The former Yugoslav Republic of Macedonia	81563.1
MLI	Mali	2.58161e+06
MAR	Morocco	840036
MUS	Mauritius	529.299
MRT	Mauritania	977333
MLT	Malta	89.295
OMN	Oman	290136
MDV	Maldives	10.0065
MEX	Mexico	6277664
MYS	Malaysia	2.18818e+06
MOZ	Mozambique	4.39245e+06
MWI	Malawi	793646
NCL	New Caledonia	15578.7
NIU	Niue	62.7845
NER	Niger	1.82522e+06
ABW	Aruba	82.02
AIA	Anguilla	22.9831
BEL	Belgium	96327.4
HKG	Hong Kong	1572.6
MNP	Northern Mariana Islands	109.947
FRO	Faroe Islands	847.853
AND	Andorra	304.33
GIB	Gibraltar	14.1905
IMN	Isle of Man	587.684
LUX	Luxembourg	8394.84
MAC	Macau	14.4142
MCO	Monaco	24.653
PSE	Palestine	13873.5
MYT	Mayotte	161.493
ALA	Aaland Islands	2732.97
NFK	Norfolk Island	14.1005
CCK	Cocos (Keeling) Islands	2.82908
ATA	Antarctica	0
BVT	Bouvet Island	8.38839
ATF	French Southern and Antarctic Lands	3457.9
HMD	Heard Island and McDonald Islands	175.925
IOT	British Indian Ocean Territory	22.4005
CXR	Christmas Island	26.8668
UMI	United States Minor Outlying Islands	6.32919
VUT	Vanuatu	8324.03
NGA	Nigeria	4.67112e+06
NLD	Netherlands	105144
NOR	Norway	1.11422e+06
NPL	Nepal	711631
NRU	Nauru	2.62544
SUR	Suriname	1.36548e+06
NIC	Nicaragua	637670
NZL	New Zealand	296641
PRY	Paraguay	2.45883e+06
PER	Peru	8.34813e+06
PAK	Pakistan	2035138
POL	Poland	1311855
PAN	Panama	467465
PRT	Portugal	231390
PNG	Papua New Guinea	1.67319e+06
GNB	Guinea-Bissau	144621
QAT	Qatar	7958.98
REU	Reunion	600.991
ROU	Romania	806817
MDA	Republic of Moldova	143022
PHL	Philippines	1.00421e+06
PRI	Puerto Rico	10579
RUS	Russia	63827684
RWA	Rwanda	171850
SAU	Saudi Arabia	1.50875e+06
KNA	Saint Kitts and Nevis	90.252
SYC	Seychelles	163.577
ZAF	South Africa	5879035
LSO	Lesotho	91817.5
BWA	Botswana	2465604
SEN	Senegal	834048
SVN	Slovenia	73458.7
SLE	Sierra Leone	432128
SGP	Singapore	1109.27
SOM	Somalia	1.5839e+06
ESP	Spain	1.43605e+06
LCA	Saint Lucia	309.337
SDN	Sudan	6.44903e+06
SWE	Sweden	1.61511e+06
SYR	Syrian Arab Republic	242966
CHE	Switzerland	130241
TTO	Trinidad and Tobago	21811
THA	Thailand	2.73623e+06
TJK	Tajikistan	355482
TKL	Tokelau	0
TON	Tonga	211.236
TGO	Togo	302914
STP	Sao Tome and Principe	371.289
TUN	Tunisia	284879
TUR	Turkey	2.03093e+06
TUV	Tuvalu	4.39499
TKM	Turkmenistan	1.22029e+06
TZA	United Republic of Tanzania	5569142
UGA	Uganda	1.56628e+06
GBR	United Kingdom	646870
UKR	Ukraine	2488085
USA	United States	29095912
BFA	Burkina Faso	1250226
URY	Uruguay	815514
UZB	Uzbekistan	1.15179e+06
VCT	Saint Vincent and the Grenadines	173.441
VEN	Venezuela	6841428
VGB	British Virgin Islands	82.6493
VNM	Viet Nam	1.92101e+06
VIR	United States Virgin Islands	211.292
NAM	Namibia	3.10871e+06
WLF	Wallis and Futuna Islands	41.1009
WSM	Samoa	1070.48
SWZ	Swaziland	117107
YEM	Yemen	426384
ZMB	Zambia	5.15515e+06
ZWE	Zimbabwe	2.70147e+06
IDN	Indonesia	8463957
GLP	Guadeloupe	1112.68
ANT	Netherlands Antilles	283.622
ARE	United Arab Emirates	66164.8
TLS	Timor-Leste	29547
PCN	Pitcairn Islands	5.04156
PLW	Palau	217.484
MHL	Marshall Islands	10.1677
SPM	Saint Pierre and Miquelon	160.523
SHN	Saint Helena	49.6833
SMR	San Marino	88.0463
TCA	Turks and Caicos Islands	197.615
ESH	Western Sahara	206073
VAT	Holy See (Vatican City)	0.911095
SJM	Svalbard	33529.4
MAF	Saint Martin	8.0656
BLM	Saint Barthelemy	31.379
GGY	Guernsey	39.8686
JEY	Jersey	98.4082
SGS	South Georgia South Sandwich Islands	2966.95
TWN	Taiwan	117361
SRB	NA	355716

## Sheet: 2.Maximum_Species_per_Country
ISO3_country	Country	SR_Max
ATG	Antigua and Barbuda	73.8457
DZA	Algeria	193.555
AZE	Azerbaijan	312.917
ALB	Albania	241.762
ARM	Armenia	312.917
AGO	Angola	617.318
ASM	American Samoa	61.9713
ARG	Argentina	654.294
AUS	Australia	525.204
BHR	Bahrain	66.6841
BRB	Barbados	66.199
BMU	Bermuda	20.3497
BHS	Bahamas	94.3709
BGD	Bangladesh	484.34
BLZ	Belize	504.3
BIH	Bosnia and Herzegovina	224.745
BOL	Bolivia	902.901
MMR	Burma	671.384
BEN	Benin	492.928
SLB	Solomon Islands	183.178
BRA	Brazil	966.005
BGR	Bulgaria	263.127
BRN	Brunei Darussalam	630.073
CAN	Canada	252.072
KHM	Cambodia	572.251
LKA	Sri Lanka	384.823
COG	Congo	633.527
COD	Democratic Republic of the Congo	912.507
BDI	Burundi	706.456
CHN	China	671.384
AFG	Afghanistan	236.593
BTN	Bhutan	580.469
CHL	Chile	180.262
CYM	Cayman Islands	80.5543
CMR	Cameroon	790.839
TCD	Chad	426.744
COM	Comoros	73.7164
COL	Colombia	938.749
CRI	Costa Rica	731.702
CAF	Central African Republic	611.489
CUB	Cuba	194.156
CPV	Cape Verde	47
COK	Cook Islands	47.8565
CYP	Cyprus	121.165
DNK	Denmark	180.975
DJI	Djibouti	244.016
DMA	Dominica	89.9155
DOM	Dominican Republic	185.966
ECU	Ecuador	958.697
EGY	Egypt	167.039
IRL	Ireland	126.199
GNQ	Equatorial Guinea	648.275
EST	Estonia	239.532
ERI	Eritrea	397.675
SLV	El Salvador	385.84
ETH	Ethiopia	544.57
AUT	Austria	244.288
CZE	Czech Republic	239.709
GUF	French Guiana	907.51
FIN	Finland	223.089
FJI	Fiji	113.165
FLK	Falkland Islands (Malvinas)	79.5554
FSM	Micronesia, Federated States of	62.9358
PYF	French Polynesia	56.6474
FRA	France	245.092
GMB	Gambia	501.771
GAB	Gabon	641.241
GEO	Georgia	287.011
GHA	Ghana	626.08
GRD	Grenada	96.09
GRL	Greenland	42
DEU	Germany	224.303
GUM	Guam	48.1829
GRC	Greece	262.972
GTM	Guatemala	544.61
GIN	Guinea	671.843
GUY	Guyana	902.416
HTI	Haiti	185.099
HND	Honduras	551.641
HRV	Croatia	237.268
HUN	Hungary	245.132
ISL	Iceland	63.2551
IND	India	624.135
IRN	Iran (Islamic Republic of)	312.651
ISR	Israel	237.253
ITA	Italy	237.944
CIV	Cote d'Ivoire	671.843
IRQ	Iraq	181.522
JPN	Japan	198.745
JAM	Jamaica	152.661
JOR	Jordan	220.906
KEN	Kenya	724.715
KGZ	Kyrgyzstan	249.494
PRK	Korea, Democratic People's Republic of	240.77
KIR	Kiribati	43.2449
KOR	Korea, Republic of	172.172
KWT	Kuwait	130.298
KAZ	Kazakhstan	289.483
LAO	Lao People's Democratic Republic	637.718
LBN	Lebanon	229.138
LVA	Latvia	251.31
BLR	Belarus	256.567
LTU	Lithuania	249.578
LBR	Liberia	667.405
SVK	Slovakia	245.917
LIE	Liechtenstein	208.144
LBY	Libyan Arab Jamahiriya	124.32
MDG	Madagascar	355.478
MTQ	Martinique	99.2626
MNG	Mongolia	290.572
MSR	Montserrat	63.912
MKD	The former Yugoslav Republic of Macedonia	254.909
MLI	Mali	424.413
MAR	Morocco	207.356
MUS	Mauritius	56.673
MRT	Mauritania	311.374
MLT	Malta	45.7185
OMN	Oman	129.989
MDV	Maldives	28.2867
MEX	Mexico	520.037
MYS	Malaysia	743.95
MOZ	Mozambique	692.086
MWI	Malawi	690.353
NCL	New Caledonia	135.409
NIU	Niue	55
NER	Niger	429
ABW	Aruba	78.4265
AIA	Anguilla	63.0119
BEL	Belgium	200.837
HKG	Hong Kong	367.227
MNP	Northern Mariana Islands	57.9285
FRO	Faroe Islands	53
AND	Andorra	197.138
GIB	Gibraltar	183.25
IMN	Isle of Man	106.319
LUX	Luxembourg	202.491
MAC	Macau	312.632
MCO	Monaco	191.288
PSE	Palestine	218.956
MYT	Mayotte	62.06
ALA	Aaland Islands	164.836
NFK	Norfolk Island	36.2011
CCK	Cocos (Keeling) Islands	17.3783
ATA	Antarctica	NA
BVT	Bouvet Island	21.082
ATF	French Southern and Antarctic Lands	47
HMD	Heard Island and McDonald Islands	39.6198
IOT	British Indian Ocean Territory	21.6236
CXR	Christmas Island	41.1406
UMI	United States Minor Outlying Islands	30.0738
VUT	Vanuatu	106.567
NGA	Nigeria	638.257
NLD	Netherlands	192.228
NOR	Norway	183.637
NPL	Nepal	574.854
NRU	Nauru	22.8646
SUR	Suriname	876.862
NIC	Nicaragua	564.498
NZL	New Zealand	131.776
PRY	Paraguay	654.021
PER	Peru	996.27
PAK	Pakistan	306.653
POL	Poland	250.962
PAN	Panama	737.806
PRT	Portugal	207.239
PNG	Papua New Guinea	459.234
GNB	Guinea-Bissau	462.147
QAT	Qatar	79.7609
REU	Reunion	53.9437
ROU	Romania	250.079
MDA	Republic of Moldova	248.693
PHL	Philippines	408.748
PRI	Puerto Rico	166.524
RUS	Russia	301.402
RWA	Rwanda	727.606
SAU	Saudi Arabia	173.815
KNA	Saint Kitts and Nevis	62.9502
SYC	Seychelles	62.5802
ZAF	South Africa	646.598
LSO	Lesotho	359.952
BWA	Botswana	587.133
SEN	Senegal	498.518
SVN	Slovenia	240.317
SLE	Sierra Leone	592.141
SGP	Singapore	555.225
SOM	Somalia	394.51
ESP	Spain	247.738
LCA	Saint Lucia	85.5299
SDN	Sudan	665.578
SWE	Sweden	190.524
SYR	Syrian Arab Republic	229.138
CHE	Switzerland	227.857
TTO	Trinidad and Tobago	419.893
THA	Thailand	680.461
TJK	Tajikistan	246.307
TKL	Tokelau	0
TON	Tonga	66.9736
TGO	Togo	593.993
STP	Sao Tome and Principe	76.7421
TUN	Tunisia	192.399
TUR	Turkey	284.169
TUV	Tuvalu	24.483
TKM	Turkmenistan	265.899
TZA	United Republic of Tanzania	734.9
UGA	Uganda	923.006
GBR	United Kingdom	174.891
UKR	Ukraine	259.706
USA	United States	316.763
BFA	Burkina Faso	464.672
URY	Uruguay	392.516
UZB	Uzbekistan	249.261
VCT	Saint Vincent and the Grenadines	86.4876
VEN	Venezuela	875.311
VGB	British Virgin Islands	77.1869
VNM	Viet Nam	670.66
VIR	United States Virgin Islands	92.6481
NAM	Namibia	587.176
WLF	Wallis and Futuna Islands	49.3291
WSM	Samoa	74.9018
SWZ	Swaziland	604.864
YEM	Yemen	176.323
ZMB	Zambia	662.118
ZWE	Zimbabwe	692.086
IDN	Indonesia	642.794
GLP	Guadeloupe	97.0557
ANT	Netherlands Antilles	90.9615
ARE	United Arab Emirates	130.225
TLS	Timor-Leste	232.671
PCN	Pitcairn Islands	25.0998
PLW	Palau	77.4753
MHL	Marshall Islands	31.2231
SPM	Saint Pierre and Miquelon	67.3049
SHN	Saint Helena	32.9889
SMR	San Marino	177.509
TCA	Turks and Caicos Islands	78.3064
ESH	Western Sahara	100.358
VAT	Holy See (Vatican City)	187.568
SJM	Svalbard	23.8186
MAF	Saint Martin	68.5904
BLM	Saint Barthelemy	68.5904
GGY	Guernsey	75.539
JEY	Jersey	93.3065
SGS	South Georgia South Sandwich Islands	42.7129
TWN	Taiwan	311.281
SRB	NA	238.928

## Sheet: 3.Mean_ASR_per_Country
ISO_country	MeanASR_Per_Country
ABW	0
AFG	43956.8
AGO	25638.9
AIA	0
ALA	0
ALB	108505
AND	32398.1
ANT	0
ARE	575203
ARG	704856
ARM	79093.7
ASM	0
ATA	0
ATF	0
ATG	0
AUS	114745
AUT	69873.4
AZE	106874
BDI	1.80531e+06
BEL	30724.4
BEN	160813
BFA	13600.8
BGD	141196
BGR	76162.7
BHR	115665
BHS	0
BIH	46588.7
BLM	0
BLR	18457.9
BLZ	244827
BMU	0
BOL	52401.7
BRA	1.73166e+06
BRB	0
BRN	3799.31
BTN	92026.8
BVT	0
BWA	15327.8
CAF	36460.3
CAN	161425
CCK	0
CHE	46343
CHL	47636.7
CHN	304162
CIV	345069
CMR	1.13909e+06
COD	285085
COG	75654.9
COK	0
COL	298872
COM	0
CPV	0
CRI	303397
CUB	99163
CXR	0
CYM	0
CYP	1746.7
CZE	32537.5
DEU	88688
DJI	0
DMA	0
DNK	5194.4
DOM	54563.6
DZA	1.06365e+06
ECU	356136
EGY	439558
ERI	4101.72
ESH	0
ESP	129088
EST	8127.46
ETH	11140.6
FIN	3615.16
FJI	0
FLK	0
FRA	168302
FRO	0
FSM	0
GAB	133062
GBR	6686.1
GEO	101351
GGY	0
GHA	394348
GIB	0
GIN	95665.9
GLP	0
GMB	10675.7
GNB	77362.4
GNQ	238306
GRC	104910
GRD	0
GRL	0
GTM	75063.7
GUF	35741
GUM	0
GUY	28261.8
HKG	50151.3
HMD	0
HND	61524.5
HRV	71660.6
HTI	103100
HUN	62802.1
IDN	68615.4
IMN	0
IND	1.76296e+06
IOT	0
IRL	1082.54
IRN	78911.2
IRQ	36461.8
ISL	0
ISR	111966
ITA	144191
JAM	94444.8
JEY	0
JOR	180803
JPN	50684
KAZ	17408.5
KEN	114839
KGZ	12596.4
KHM	75569.2
KIR	0
KNA	0
KOR	91807.4
KWT	82904.3
LAO	91109.8
LBN	218435
LBR	118219
LBY	103969
LCA	0
LIE	98552.2
LKA	125961
LSO	17539.4
LTU	18758.5
LUX	38058.4
LVA	8242.82
MAC	0
MAF	0
MAR	45989.7
MCO	18315.1
MDA	170296
MDG	12423.1
MDV	0
MEX	998433
MHL	0
MKD	95758.4
MLI	38773
MLT	0
MMR	193122
MNG	2652.82
MNP	0
MOZ	48895.7
MRT	12103.7
MSR	0
MTQ	0
MUS	0
MWI	73794.6
MYS	33104.4
MYT	0
NAM	1822.3
NCL	0
NER	143217
NFK	0
NGA	1.82365e+06
NIC	130117
NIU	0
NLD	29128.7
NOR	3973.26
NPL	75033.7
NRU	0
NZL	19716.1
OMN	325596
PAK	41409.9
PAN	70034.6
PCN	0
PER	150968
PHL	83102.1
PLW	0
PNG	8968.48
POL	30820.6
PRI	40977.7
PRK	62962.8
PRT	162746
PRY	74500.3
PSE	117504
PYF	0
QAT	0
REU	0
ROU	97454.9
RUS	31898.7
RWA	1.80482e+06
SAU	85218.1
SDN	534389
SEN	344340
SGP	15217.6
SGS	0
SHN	0
SJM	0
SLB	0
SLE	95267.4
SLV	63815.8
SMR	55449.9
SOM	10771.2
SPM	0
SRB	95658.6
STP	0
SUR	41311.1
SVK	43880.8
SVN	67892.2
SWE	3030.32
SWZ	64741.4
SYC	0
SYR	78028.3
TCA	0
TCD	39716.7
TGO	172388
THA	76358.7
TJK	41804.9
TKL	0
TKM	32892.7
TLS	4671.64
TON	0
TTO	79213.1
TUN	1.13219e+06
TUR	61894.5
TUV	0
TWN	160220
TZA	252219
UGA	880226
UKR	81675
UMI	0
URY	35604.7
USA	890412
UZB	56630.8
VAT	17153.4
VCT	0
VEN	269493
VGB	0
VIR	0
VNM	191525
VUT	0
WLF	0
WSM	0
YEM	54203
ZAF	92143.6
ZMB	66484.3
ZWE	23202.8

## Sheet: 4.TotalProduction_per_Country
ISO_country	Total_Production_Tonnes
ABW	0
AFG	110.515
AGO	32.5582
AIA	0
ALA	0
ALB	410.852
AND	172.185
ANT	0
ARE	17836.4
ARG	124.422
ARM	219.172
ASM	0
ATA	0
ATF	0
ATG	0
AUS	56.3146
AUT	346.749
AZE	497.146
BDI	2328.59
BEL	232.697
BEN	54.3694
BFA	16.8421
BGD	390.223
BGR	201.233
BHR	14790.3
BHS	0
BIH	66.3859
BLM	0
BLR	35.493
BLZ	336.598
BMU	0
BOL	38.7218
BRA	150.257
BRB	0
BRN	6.53027
BTN	76.3661
BVT	0
BWA	10.9649
CAF	20.9676
CAN	23.3729
CCK	0
CHE	226.402
CHL	221.785
CHN	370.506
CIV	309.63
CMR	271.551
COD	59.4309
COG	53.519
COK	0
COL	193.264
COM	0
CPV	0
CRI	1543.99
CUB	416.119
CXR	0
CYM	0
CYP	38.7265
CZE	80.3474
DEU	315.632
DJI	0
DMA	0
DNK	45.0594
DOM	570.08
DZA	3384.82
ECU	732.401
EGY	3868.25
ERI	25.2401
ESH	0
ESP	504.881
EST	8.34434
ETH	49.0417
FIN	10.6118
FJI	0
FLK	0
FRA	301.54
FRO	0
FSM	0
GAB	192.099
GBR	75.088
GEO	140.65
GGY	0
GHA	556.508
GIB	0
GIN	112.762
GLP	0
GMB	24.8397
GNB	110.656
GNQ	305.164
GRC	466.028
GRD	0
GRL	0
GTM	413.233
GUF	8.15269
GUM	0
GUY	10.7091
HKG	423.508
HMD	0
HND	262.426
HRV	194.333
HTI	800.614
HUN	276.064
IDN	94.506
IMN	0
IND	389.696
IOT	0
IRL	12.0404
IRN	370.096
IRQ	170.542
ISL	0
ISR	996.003
ITA	788.909
JAM	714.723
JEY	0
JOR	742.669
JPN	316.638
KAZ	20.0217
KEN	99.7936
KGZ	29.9551
KHM	85.9135
KIR	0
KNA	0
KOR	883.655
KWT	2056.29
LAO	85.0573
LBN	1613.83
LBR	114.26
LBY	1140.22
LCA	0
LIE	1380.98
LKA	379.967
LSO	38.5668
LTU	40.3649
LUX	134.994
LVA	15.6655
MAC	0
MAF	0
MAR	327.138
MCO	112.811
MDA	319.295
MDG	24.3259
MDV	0
MEX	281.833
MHL	0
MKD	291.022
MLI	35.2247
MLT	0
MMR	93.489
MNG	2.54875
MNP	0
MOZ	50.0146
MRT	15.1031
MSR	0
MTQ	0
MUS	0
MWI	89.6827
MYS	74.0305
MYT	0
NAM	3.63193
NCL	0
NER	64.9946
NFK	0
NGA	387.987
NIC	105.219
NIU	0
NLD	535.47
NOR	19.581
NPL	143.017
NRU	0
NZL	247.141
OMN	3810.11
PAK	170.897
PAN	285.833
PCN	0
PER	136.78
PHL	492.306
PLW	0
PNG	49.1022
POL	129.935
PRI	551.408
PRK	204.05
PRT	391.821
PRY	32.3217
PSE	1134.17
PYF	0
QAT	0
REU	0
ROU	223.295
RUS	32.7171
RWA	3453.59
SAU	1075.43
SDN	442.476
SEN	138.309
SGP	76.2304
SGS	0
SHN	0
SJM	0
SLB	0
SLE	57.9373
SLV	291.34
SMR	712.932
SOM	72.4936
SPM	0
SRB	232.864
STP	0
SUR	23.0485
SVK	100.56
SVN	269.981
SWE	14.5072
SWZ	72.3565
SYC	0
SYR	551.368
TCA	0
TCD	19.4955
TGO	151.517
THA	245.463
TJK	58.1926
TKL	0
TKM	87.9839
TLS	13.5459
TON	0
TTO	114.724
TUN	4306.41
TUR	312.378
TUV	0
TWN	865.594
TZA	67.475
UGA	1582.76
UKR	94.3706
UMI	0
URY	36.2726
USA	552.035
UZB	147.63
VAT	183.008
VCT	0
VEN	103.804
VGB	0
VIR	0
VNM	208.307
VUT	0
WLF	0
WSM	0
YEM	285.984
ZAF	108.713
ZMB	22.1366
ZWE	14.831

## Sheet: 5.Mean_BP_per_Country
ISO_country	MeanBP_Per_Country
COG	1.66848e+24
AUS	4.776e+23
MDA	2.24862e+23
PRK	2.23359e+23
MNG	1.27088e+23
TUN	1.10017e+23
DZA	7.9581e+22
PSE	2.91047e+22
LBN	2.45059e+22
EGY	2.05864e+22
GUY	39031.4
CMR	33557.2
ZMB	32220.5
SUR	30055.8
BRA	29590.9
GNQ	29297.2
ECU	28638.7
TZA	28016.1
LAO	27512.1
NGA	27423
GUF	26824.3
ZWE	26715
MMR	25518.3
MOZ	25038.5
LTU	24152.6
CAF	23425.6
BOL	22400.3
PRY	22347.1
VEN	22091.3
COL	21478.6
VNM	21353
UGA	21257.7
MYS	20249
BTN	20036.3
BLR	20023.6
TCD	19550.9
KEN	18887.1
RWA	17928.5
LVA	17829.3
BDI	17794.5
NPL	17295.2
EST	17251.3
PAN	17018.6
COD	16866.8
GEO	16780.1
MWI	16633.5
BWA	16396.9
AGO	16221.6
RUS	15886.7
KAZ	15861.8
BGD	15812.5
TJK	15494.5
SWZ	14987.8
ZAF	14779
SDN	14774.2
UKR	14722.6
HRV	14213.7
IND	13860.3
GHA	13668.9
TLS	13602.5
THA	13534.6
BLZ	13533.7
FIN	13419.7
KGZ	13303.2
NIC	13075.9
AZE	12967.5
PRT	12776.7
ETH	12651.6
PHL	12591.2
SRB	12549.8
POL	12315.5
MKD	12305.9
BEN	12302.1
BIH	12184.9
HKG	11945.7
IDN	11937.7
KHM	11723.5
SVK	11483
TGO	11136.2
CIV	10697.9
BGR	10642.2
MEX	10468.9
GAB	10430.8
SOM	10403.3
ARM	10346.6
PER	10341.7
GTM	10318.5
ROU	9867.82
HUN	9719.65
UZB	9644.75
TKM	9565.97
URY	9526.02
BFA	9515.31
TTO	9105.16
MDG	9103.48
CHN	8799.81
NAM	8303.63
HND	8095.24
ALB	7973.21
CRI	7912.24
GIN	7779.09
TWN	7735.48
LKA	7732.73
PAK	7693.11
SVN	7642.36
LBR	7580.26
SLV	7384.19
ARG	7226.48
NER	7181.27
JOR	7153.02
LUX	7110.7
CAN	7064.55
ISR	6946.92
AFG	6939.77
CZE	6778.89
SLE	6678.95
LSO	6564.32
SWE	6539.86
MLI	6504.48
ERI	6439.53
BRN	6419.95
DEU	6201.98
CHE	6101.51
ESP	6078.63
SGP	5841.65
TUR	5826.75
FRA	5702.49
USA	5664.74
GRC	5623.73
BEL	5594.83
AUT	5532
NOR	5388.38
GNB	5289.04
MAR	5248.09
NLD	5242.05
IRN	5164.35
PNG	5120.4
SYR	5078.16
SEN	4980.42
DNK	4962.23
ITA	4875.15
AND	4793.26
YEM	4758.05
MCO	4711.66
VAT	4638.39
SAU	4592.39
SMR	4243.94
HTI	4243.64
IRQ	4069.11
DOM	3348.55
LIE	3302.93
GBR	3257.69
CHL	3253.23
JPN	3209.14
CUB	3147.34
JAM	3062.91
PRI	3050.94
NZL	2432.31
GMB	2385.96
LBY	2364.67
IRL	2334.73
MRT	2073.14
KOR	1719.67
KWT	1511.37
OMN	1023.39
ARE	983.66
BHR	877.247
CYP	514.282
ABW	0
AIA	0
ALA	0
ANT	0
ASM	0
ATA	0
ATF	0
ATG	0
BHS	0
BLM	0
BMU	0
BRB	0
BVT	0
CCK	0
COK	0
COM	0
CPV	0
CXR	0
CYM	0
DJI	0
DMA	0
ESH	0
FJI	0
FLK	0
FRO	0
FSM	0
GGY	0
GIB	0
GLP	0
GRD	0
GRL	0
GUM	0
HMD	0
IMN	0
IOT	0
ISL	0
JEY	0
KIR	0
KNA	0
LCA	0
MAC	0
MAF	0
MDV	0
MHL	0
MLT	0
MNP	0
MSR	0
MTQ	0
MUS	0
MYT	0
NCL	0
NFK	0
NIU	0
NRU	0
PCN	0
PLW	0
PYF	0
QAT	0
REU	0
SGS	0
SHN	0
SJM	0
SLB	0
SPM	0
STP	0
SYC	0
TCA	0
TKL	0
TON	0
TUV	0
UMI	0
VCT	0
VGB	0
VIR	0
VUT	0
WLF	0
WSM	0
SUM	2.98519e+24

## Sheet: 6.ISO3_CountryNames
NAME	ISO3
Afghanistan	AFG
Albania	ALB
Algeria	DZA
Angola	AGO
Antigua and Barbuda	ATG
Argentina	ARG
Armenia	ARM
Australia	AUS
Austria	AUT
Azerbaijan	AZE
Bahamas	BHS
Bahrain	BHR
Bangladesh	BGD
Barbados	BRB
Belarus	BLR
Belgium	BEL
Belize	BLZ
Benin	BEN
Bermuda	BMU
Bhutan	BTN
Bolivia (Plurinational State of)	BOL
Bosnia and Herzegovina	BIH
Botswana	BWA
Brazil	BRA
Brunei Darussalam	BRN
Bulgaria	BGR
Burkina Faso	BFA
Burundi	BDI
Cabo Verde	CPV
Cambodia	KHM
Cameroon	CMR
Canada	CAN
Central African Republic	CAF
Chad	TCD
Chile	CHL
China, Hong Kong SAR	HKG
China, Macao SAR	MAC
China, Taiwan Province of	TWN
China, mainland	CHN
Colombia	COL
Comoros	COM
Congo	COG
Costa Rica	CRI
Croatia	HRV
Cuba	CUB
Cyprus	CYP
Czechia	CZE
Czechoslovakia	NA
Côte d'Ivoire	CIV
Democratic People's Republic of Korea	PRK
Democratic Republic of the Congo	COD
Denmark	DNK
Djibouti	DJI
Dominica	DMA
Dominican Republic	DOM
Ecuador	ECU
Egypt	EGY
El Salvador	SLV
Equatorial Guinea	GNQ
Eritrea	ERI
Estonia	EST
Eswatini	SWZ
Ethiopia	ETH
Faroe Islands	FRO
Fiji	FJI
Finland	FIN
France	FRA
Gabon	GAB
Gambia	GMB
Georgia	GEO
Germany	DEU
Ghana	GHA
Greece	GRC
Grenada	GRD
Guatemala	GTM
Guinea	GIN
Guinea-Bissau	GNB
Guyana	GUY
Haiti	HTI
Honduras	HND
Hungary	HUN
Iceland	ISL
India	IND
Indonesia	IDN
Iran (Islamic Republic of)	IRN
Iraq	IRQ
Ireland	IRL
Israel	ISR
Italy	ITA
Ivory Coast	CIV
Jamaica	JAM
Japan	JPN
Jordan	JOR
Kazakhstan	KAZ
Kenya	KEN
Kiribati	KIR
Kuwait	KWT
Kyrgyzstan	KGZ
Lao People's Democratic Republic	LAO
Latvia	LVA
Lebanon	LBN
Lesotho	LSO
Liberia	LBR
Libya	LBY
Liechtenstein	LIE
Lithuania	LTU
Luxembourg	LUX
Madagascar	MDG
Malawi	MWI
Malaysia	MYS
Maldives	MDV
Mali	MLI
Malta	MLT
Martinique	MTQ
Mauritania	MRT
Mauritius	MUS
Mexico	MEX
Micronesia (Federated States of)	FSM
Mongolia	MNG
Montenegro	MNE
Montserrat	MSR
Morocco	MAR
Mozambique	MOZ
Myanmar	MMR
Namibia	NAM
Nepal	NPL
Netherlands	NLD
New Zealand	NZL
Nicaragua	NIC
Niger	NER
Nigeria	NGA
North Macedonia	MKD
Norway	NOR
Oman	OMN
Pakistan	PAK
Palestine	PSE
Panama	PAN
Papua New Guinea	PNG
Paraguay	PRY
Peru	PER
Philippines	PHL
Poland	POL
Portugal	PRT
Qatar	QAT
Republic of Korea	KOR
Republic of Moldova	MDA
Romania	ROU
Russian Federation	RUS
Rwanda	RWA
Saint Kitts and Nevis	KNA
Saint Lucia	LCA
Saint Vincent and the Grenadines	VCT
Samoa	WSM
Sao Tome and Principe	STP
Saudi Arabia	SAU
Senegal	SEN
Serbia	SRB
Serbia and Montenegro	NA
Seychelles	SYC
Sierra Leone	SLE
Singapore	SGP
Slovakia	SVK
Slovenia	SVN
Solomon Islands	SLB
Somalia	SOM
South Africa	ZAF
South Sudan	SSD
Spain	ESP
Sri Lanka	LKA
Sudan	SDN
Suriname	SUR
Sweden	SWE
Switzerland	CHE
Syrian Arab Republic	SYR
Tajikistan	TJK
Thailand	THA
Timor-Leste	TLS
Togo	TGO
Tokelau	TKL
Tonga	TON
Trinidad and Tobago	TTO
Tunisia	TUN
Turkey	TUR
Turkmenistan	TKM
Tuvalu	TUV
USSR	NA
Uganda	UGA
Ukraine	UKR
United Arab Emirates	ARE
United Kingdom	GBR
United Republic of Tanzania	TZA
United States of America	USA
Uruguay	URY
Uzbekistan	UZB
Vanuatu	VUT
Venezuela (Bolivarian Republic of)	VEN
Viet Nam	VNM
Western Sahara	ESH
Yemen	YEM
Yugoslav SFR	NA
Zambia	ZMB
Zimbabwe	ZWE
American Samoa	ASM
Bolivia	BOL
Burma	MMR
China	CHN
Cayman Islands	CYM
Cape Verde	CPV
Cook Islands	COK
Czech Republic	CZE
French Guiana	GUF
Falkland Islands (Malvinas)	FLK
Micronesia, Federated States of	FSM
French Polynesia	PYF
Greenland	GRL
Guam	GUM
Cote d'Ivoire	CIV
Korea, Democratic People's Republic of	PRK
Korea, Republic of	KOR
Libyan Arab Jamahiriya	LBY
The former Yugoslav Republic of Macedonia	MKD
New Caledonia	NCL
Niue	NIU
Aruba	ABW
Anguilla	AIA
Hong Kong	HKG
Northern Mariana Islands	MNP
Andorra	AND
Gibraltar	GIB
Isle of Man	IMN
Macau	MAC
Monaco	MCO
Mayotte	MYT
Aaland Islands	ALA
Norfolk Island	NFK
Cocos (Keeling) Islands	CCK
Antarctica	ATA
Bouvet Island	BVT
French Southern and Antarctic Lands	ATF
Heard Island and McDonald Islands	HMD
British Indian Ocean Territory	IOT
Christmas Island	CXR
United States Minor Outlying Islands	UMI
Nauru	NRU
Reunion	REU
Puerto Rico	PRI
Russia	RUS
United States	USA
Venezuela	VEN
British Virgin Islands	VGB
United States Virgin Islands	VIR
Wallis and Futuna Islands	WLF
Swaziland	SWZ
Guadeloupe	GLP
Netherlands Antilles	ANT
Pitcairn Islands	PCN
Palau	PLW
Marshall Islands	MHL
Saint Pierre and Miquelon	SPM
Saint Helena	SHN
San Marino	SMR
Turks and Caicos Islands	TCA
Holy See (Vatican City)	VAT
Svalbard	SJM
Saint Martin	MAF
Saint Barthelemy	BLM
Guernsey	GGY
Jersey	JEY
South Georgia South Sandwich Islands	SGS
Taiwan	TWN
NA	NA
